# Supplementary material for: Influence of different types of humic substances on the adsorption behavior of PFOA in soils: Experimental insights and spectral characterization
Source: Research Square preprint supplement (doi:10.21203/rs.3.rs-7183837/v1), 2025-07-31
Supplement: Supplementary file 1 [file 468eab10b4d1dcdaf590a71a.docx]

**Supplementary information**

**Influence of different types of humic substances on the adsorption behavior of PFOA in soils: Experimental insights and spectral characterization**

Mengwei Li a, b, Xinlin Wang a, b, Xiaochong Wang a, b, Wei Zhang a,b, ⃰, Guangli Xiu a,b, ⃰

*a State Environmental Protection Key Laboratory of Environmental Risk Assessment and Control on Chemical Processes, School of Resources and Environmental Engineering,* *East China University of Science and Technology, Shanghai* *200237, China*

*b Shanghai Environmental Protection Key Laboratory on Environmental Standard and Risk Management of Chemical Pollutants, East China University of Science and Technology, Shanghai 200237, China*

* Corresponding author at: State Environmental Protection Key Laboratory of Environmental Risk Assessment and Control on Chemical Processes, School of Resourcesand Environmental Engineering, East China University of Science and Technology, Shanghai 200237, China. *E-mail address:* zhangwei@ecust.edu.cn, [xiugl@ecust.edu.cn](mailto:xiugl@ecust.edu.cn).

**Text S1.** Experimental materials.

The original soil was collected from the surface soil (0-20 cm) of East China University of Science and Technology. Stones and plant debris were first removed from the original soil, and then, the soil was air-dried, crushed and sieved (<2 mm). Five kilogram of soil was collected and stored in light-proof, closed conditions. Commercial HA used in the test was derived from lignite and weathered coal, provided by the Shanghai Chuangsai Technology Co., China. Commercial FA, sourced from weathered coal and peat, was purchased from BASF Biotechnology Ltd. in Hefei, Anhui Province, China.

PFOA standards (98% purity) were purchased from Sigma-Aldrich (St. Louis, MO). The reagents used in this test, such as ammonium acetate (CH3COONH4), sulfuric acid (H2SO4), sodium hydroxide (NaOH), potassium chloride (CaCL2), etc., were of analytical purity and were from China National Pharmaceutical Group Chemical Reagents Co., Ltd. Acetonitrile (HPLC grade, Merck Chemicals Co. AQ5) was used as received.

**Text S2.** Experimental methods.

To investigate the effect of different factors on PFOA adsorption, a series of batch experiments were conducted at different pH (3, 5, 7, 9, and 11), CaCl2 concentration (0.01, 0.05, 0.1, 0.3, and 0.5 M), and soil particle size (sand: 0.050-2.000 mm, coarse powder: 0.020-0.050 mm, and fine powder: 0.002-0.020 mm). The pH was adjusted using 0.1 M H2SO4 and 0.1 M NaOH. The adsorption conditions were consistent with those used in the adsorption isotherm experiments.

SFS were recorded by scanning excitation wavelengths ranging from 200 to 600 nm at a slit width of 5 nm and a scanning speed of 24000 nm/min. Milli-Q water was used as a blank control for each HS sample. 3D-EEM was normalized by subtracting the spectra of Milli-Q water to eliminate Raman and Rayleigh scattering prior to analysis and normalizing. The spectra were recorded using spectrophotometry at excitation wavelengths (Ex) 250 to 550 nm at 5 nm increments and emission wavelengths (Em) 250 to 600 nm at 2 nm increments with 5 nm slit widths at a scan rate of 24000 nm/min.

**Text S3.** Sample analysis methods.

An elemental analyzer (vario EL cube, Elementar Unicube, Germany) was used to analyze C, N, H, O and S in soil and HS. The DOC of soil and HS was determined by leaching (TOC-L CPH, Shimadzu, Japan). Soil metal ions were determined using inductively coupled plasma emission spectroscopy (ICP-OES, PerkinElmer, USA). The surface Zeta potential of Soil, Soil+HA, and Soil+FA was analyzed using zeta potential (Zetasizer Nano ZS90, Malvern, UK). Solid-state 500 MHz CP-MAS 13C NMR analysis was employed to classify the type of organic carbon in soil and HS based on chemical shifts (Arance, Bruker, Switzerland). Surface functional groups of the soil and HS were analyzed using FT-IR spectroscopy (Nicolet iS50, Thermo, Fisher Scientific, USA). The concentration of PFOA was measured by LC-MS (LC-MS 8050, Shimadzu, Japan).

**Text S4.** Quantum chemical calculation.

The characterization of HS was shown in Table 1. The C content of HA (41.97%) was significantly higher than FA (28.83%). The lower polarity index (PI) value of HA indicated that it was more hydrophobic compared to FA. The elevated levels of nitrogen and sulfur in FA indicated a higher concentration of non-humified biomolecules such as polysaccharides and polypeptide [1]. The greater H/C and N/C ratios in FA were likely due to its higher carbohydrate and protein/amino acid content. Moreover, this observation was further supported by the results of CP-MAS 13C-NMR. HA primarily consisted of aliphatic carbon (76.17%), while FA had a higher percentage of O-alkyl carbon (65.63%), which was consistent with previously reported results [2]. In the aliphatic carbon region, the signals from 0 to 45 ppm range corresponded to the methyl, methylene, and methine groups. This suggested that the aliphatic structure of HA had a relatively high proportion of long-chain fatty acids. Compared to HA, FA had a higher proportion of o-alkyl carbon and aromatic carbon, indicating that, although FA had a lower carbohydrate content, certain sugars or polysaccharides may have still been present, and FA exhibited greater chemical stability. Additionally, the percentage of carboxyl groups was higher in FA than HA, indicating the stronger acidity of FA in aqueous solution [3,4].

**Table S1** The basic parameters of the soil.

| The basic parameters | Unit | Value |
| --- | --- | --- |
| Particle size | mm | ≤1.00 |
| pH | / | 7.66 ± 0.23 |
| EC | μs/cm | 474 ± 12 |
| OM a | g/kg | 16.53 ± 0.31 |
| Cd | mg/kg | 0.38 ± 0.02 |
| Pb | mg/kg | 11.47 ± 0.33 |
| Cu | mg/kg | 10.81 ± 0.42 |
| Fe | mg/kg | 1905.34 ± 3.26 |
| Cr | mg/kg | 27.92 ± 2.03 |
| Mn | mg/kg | 145.62 ± 2.74 |
| Sb | mg/kg | 2.67 ± 2.74 |
| Zn | mg/kg | 87.36 ± 1.38 |

a OM, organic matter.

**Table S2** Characterization of humus (HA, FA).

|  | HA | FA |
| --- | --- | --- |
| pH | 5.84±0.11 | 4.91±0.20 |
| C (%) | 41.97 | 28.33 |
| H (%) | 4.37 | 6.49 |
| N (%) | 1.09 | 2.97 |
| O (%) | 45.84 | 48.20 |
| S (%) | 0.18 | 3.21 |
| H/C | 0.10 | 0.23 |
| N/C | 0.03 | 0.10 |
| PIa | 1.12 | 1.81 |
| DOCb (%) | 0.44±0.02 | 0.59±0.08 |
| Alkyl-C 0-45 ppm (%) | 76.17 | 7.72 |
| O-alkyl-C 45-110 ppm (%) | 17.92 | 65.63 |
| Aromatic-C 110-160 ppm (%) | 5.41 | 19.01 |
| Carboxyl/carbonyl-C 160-220 ppm (%) | 0.50 | 5.67 |
| a PI, polarity index (O + N)/C.  b DOC, [dissolved organic carbon](https://www.sciencedirect.com/topics/earth-and-planetary-sciences/dissolved-organic-carbon). |  |  |

**Table S3** Physicochemical indices of soil after different humus additions.

|  | pH | EC (dS/m) | Zeta a | OM (g/kg) | DOC (%) |
| --- | --- | --- | --- | --- | --- |
| Soil | 7.66±0.23 | 414±12 | -11.3±0.2 | 16.5±0.3 | 0.16±0.08 |
| Soil+HA | 7.84±0.16 | 423±27 | -13.0±0.4 | 19.1±0.2 | 0.32±0.10 |
| Soil+FA | 7.52±0.30 | 686±19 | -14.7±0.7 | 17.0±0.4 | 0.36±0.04 |

a Zeta, surface Zeta potential of soil (pH=5.6).

**Table S4** Parameters of kinetic models fitted to the experimental data.

| Kinetic model | Parameters | Soil | Soil+HA | Soil+FA | HA | FA |
| --- | --- | --- | --- | --- | --- | --- |
| PFO | K1 (1/min) | 0.027 | 0.026 | 0.028 | 0.027 | 0.026 |
| qe1 (μg/g) | 16.07 | 15.43 | 15.38 | 13.99 | 13.60 |
| R2 | 0.9665 | 0.9732 | 0.9684 | 0.9629 | 0.9738 |
| PSO | K2 (g/μg·min) | 0.0031 | 0.0034 | 0.0026 | 0.0028 | 0.0036 |
| qe2 (μg/g) | 16.19 | 15.85 | 14.98 | 14.44 | 13.85 |
| R2 | 0.9947 | 0.9995 | 0.9946 | 0.9954 | 0.9924 |
| Elovich | α (μg/g·min) | 4.47 | 3.89 | 3.79 | 3.07 | 2.50 |
| β (g/μg) | 0.43 | 0.44 | 0.42 | 0.36 | 0.47 |
| R2 | 0.8236 | 0.8575 | 0.8805 | 0.8884 | 0.8950 |

**Table S5** Isotherm study data fitting parameters of different adsorbents.

| Isothermal model | | Parameters | Soil | Soil+HA | Soil+FA | HA | FA |
| --- | --- | --- | --- | --- | --- | --- | --- |
| Langmuir | KL (L/μg) | | 0.368 | 0.336 | 0.381 | 0.535 | 0.529 |
| qmax (μg/g) | | 55.17 | 51.71 | 45.28 | 34.10 | 32.36 |
| R2 | | 0.9937 | 0.9949 | 0.9963 | 0.9934 | 0.9905 |
| Freundlich | KF (L1/n·μg1-1/n/g) | | 17.17 | 15.80 | 15.09 | 12.84 | 12.22 |
| n | | 2.32 | 2.28 | 2.37 | 2.61 | 2.62 |
| R2 | | 0.8723 | 0.8696 | 0.8331 | 0.7969 | 0.7920 |

**Table S6** Fluorescence quenching parameters fitted to the experimental data.

| Peak | Stern-Volmer | Kq (1012 L/mol·s) | R1 | n | R2 |
| --- | --- | --- | --- | --- | --- |
| Peak A | y=0.0325x+0.9191 | 3.254 | 0.9939 | 1.42 | 0.9909 |
| Peak B | y=0.0134x+1.0829 | 1.341 | 0.9683 | 0.52 | 0.9887 |
| Peak C | y=0.0120x+1.1009 | 1.203 | 0.9909 | 0.53 | 0.9847 |

**
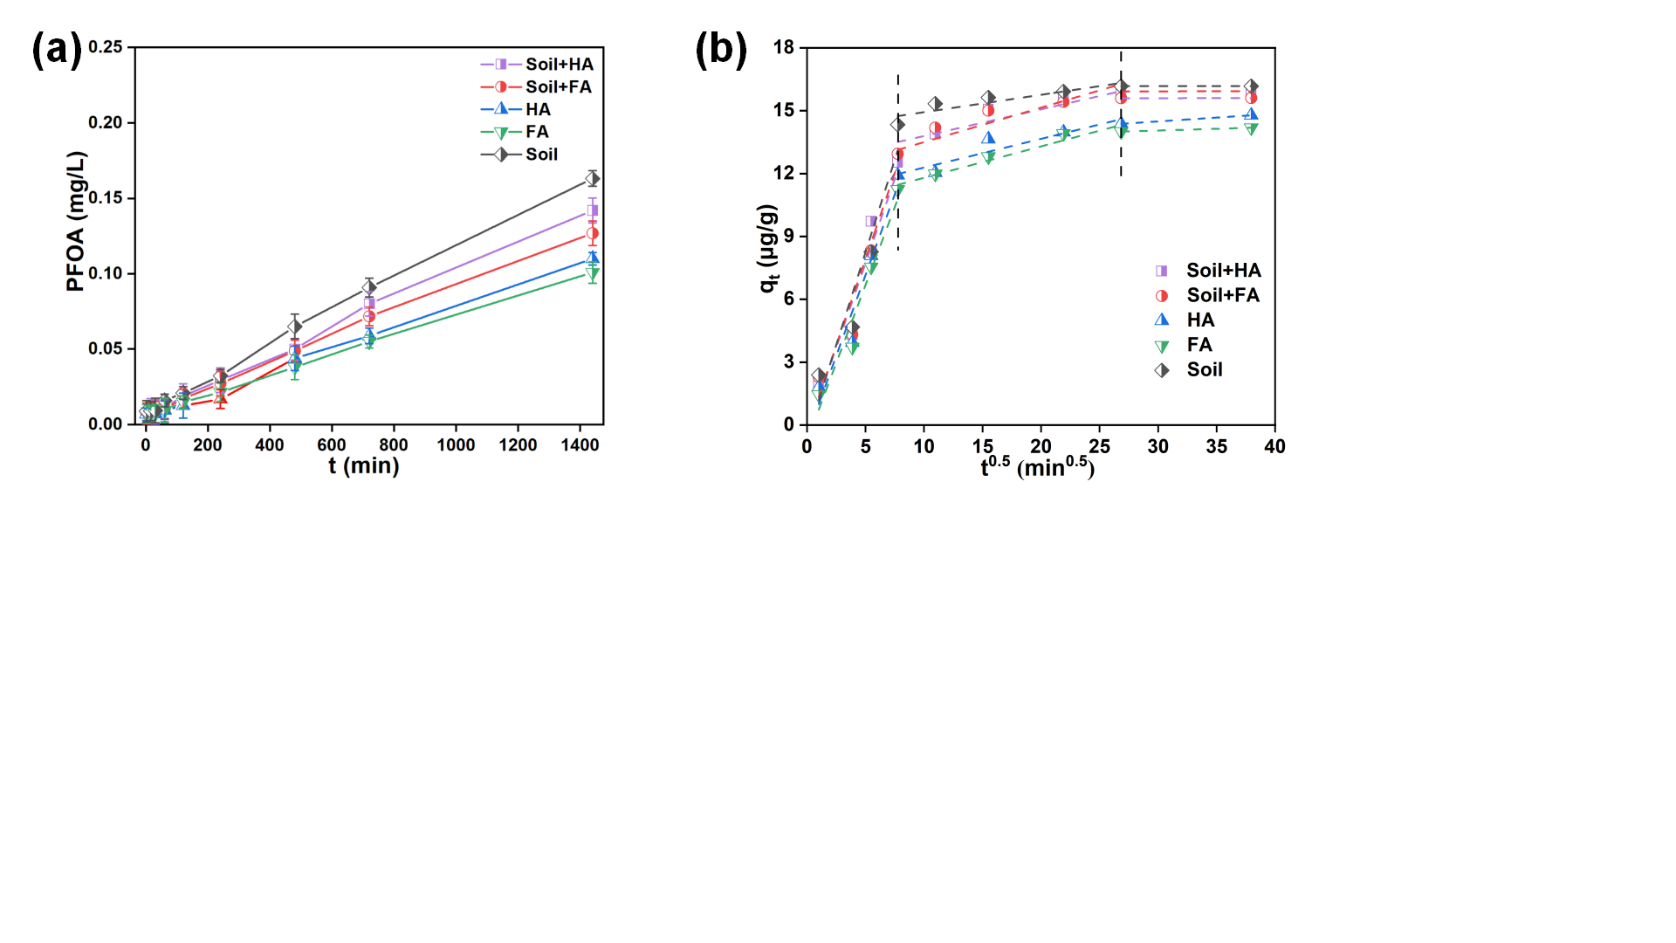
**

**Fig. S1** Desorption (a) and intraparticle diffusion curves (b) of PFOA, CPFOA=2 mg/L, T=298 K, pH=5.6.

**
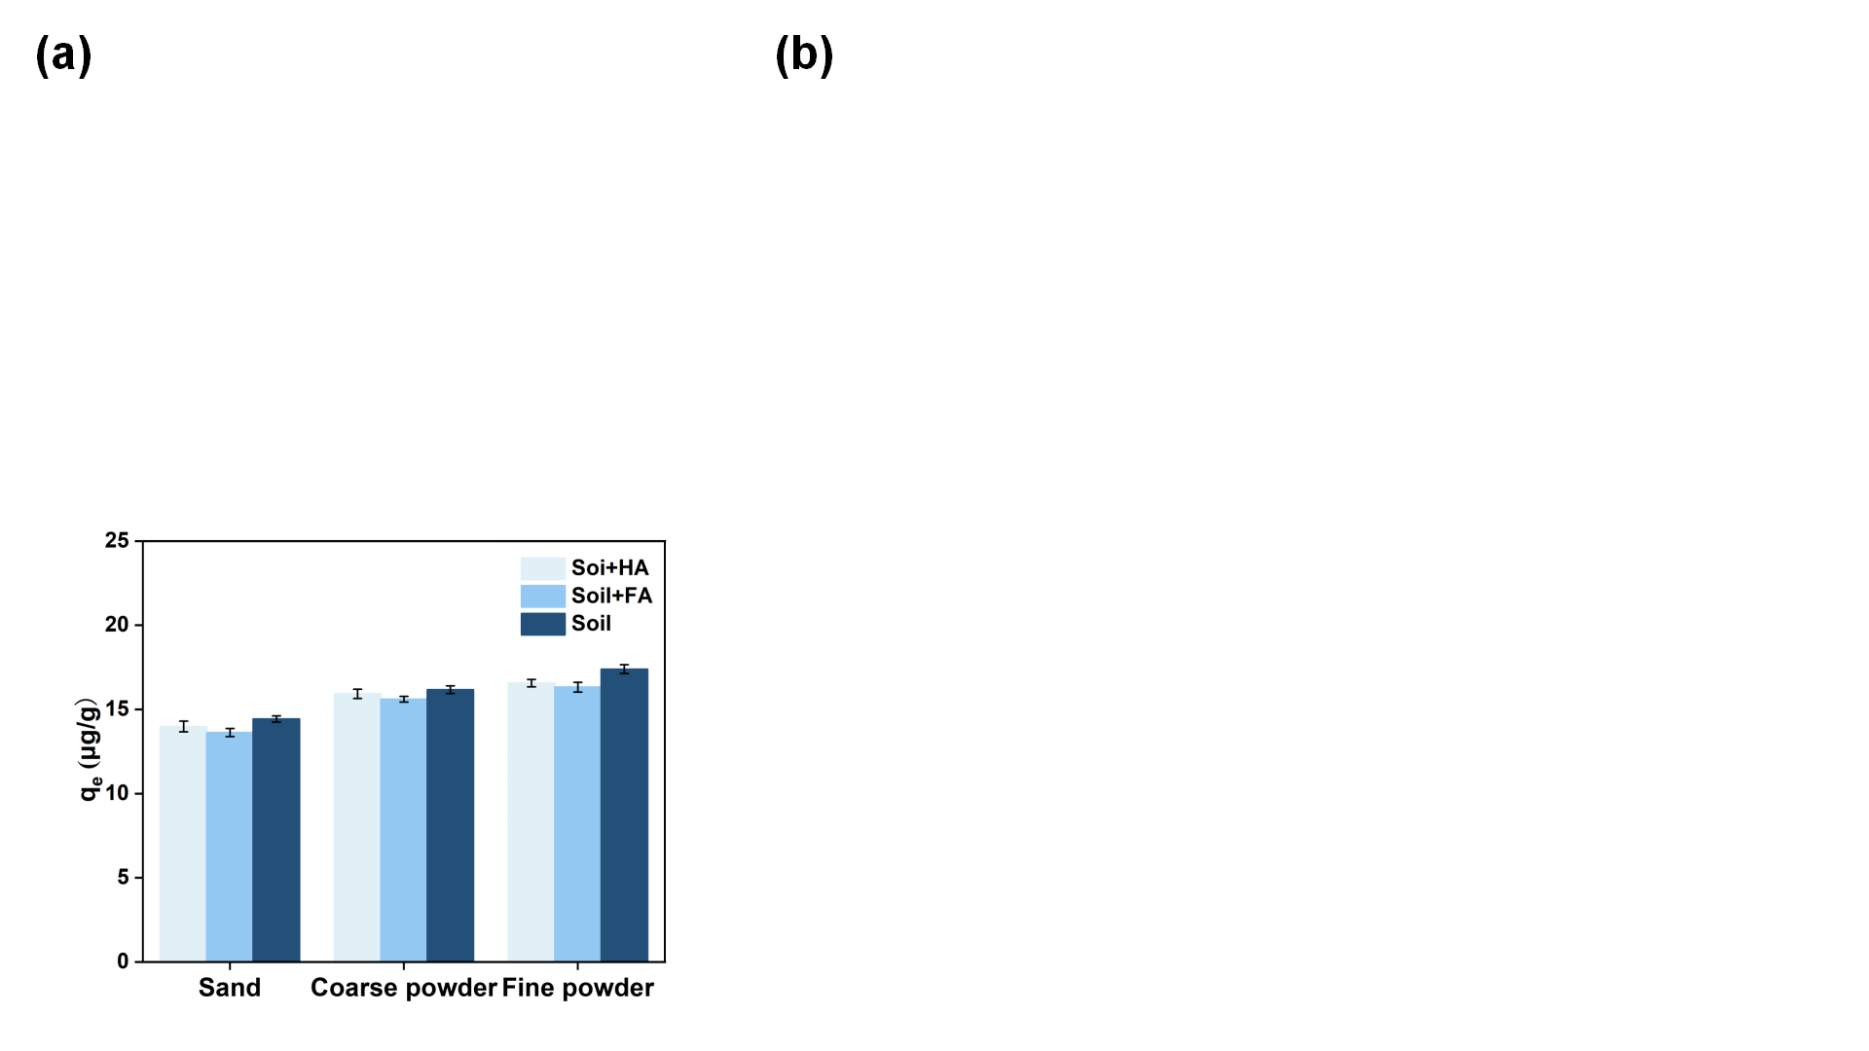
**

**Fig. S2** Effects of soil particle size on the adsorption of PFOA in three types of soils, CPFOA=2 mg/L, t=24 h, T=298 K, pH=5.6.


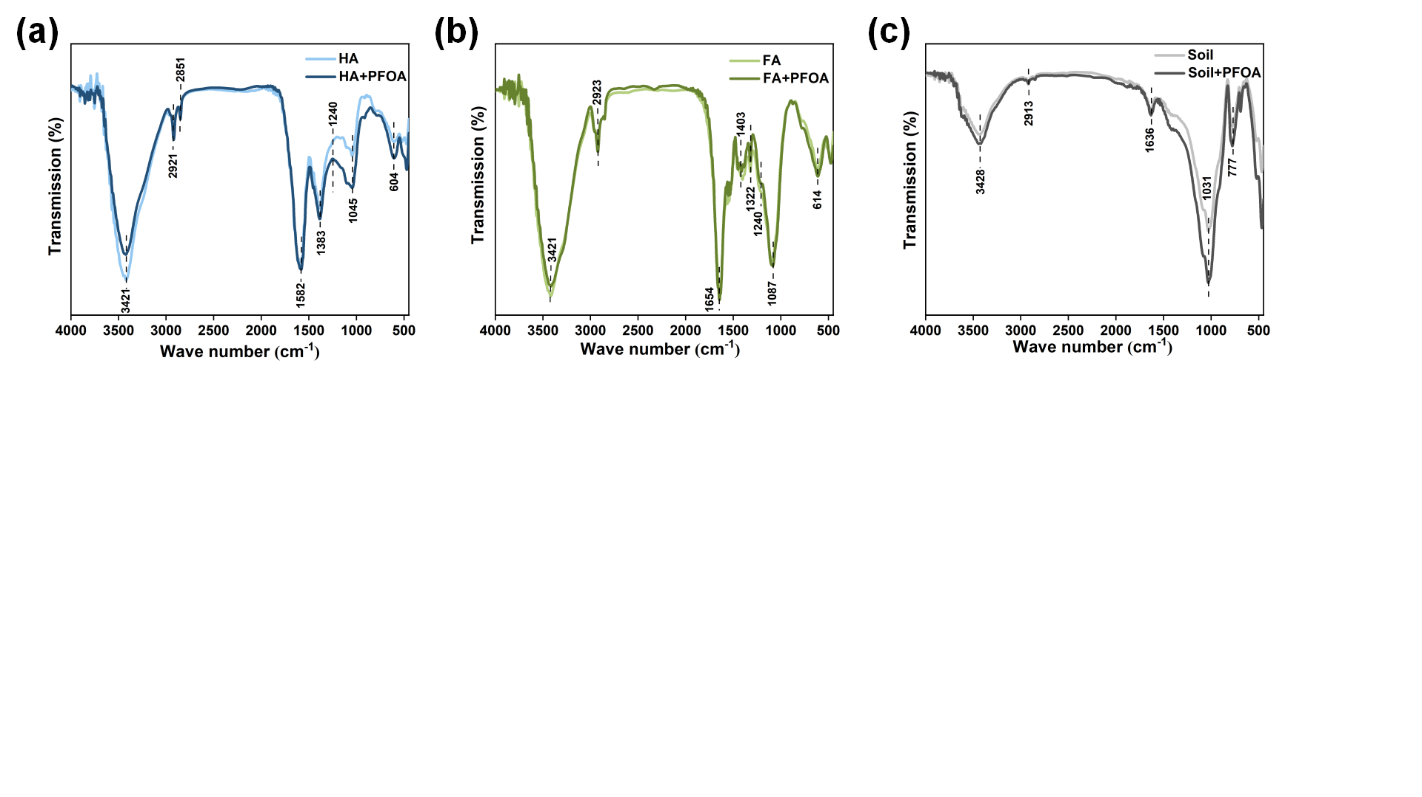


**Fig. S3** FT-IR spectra of HS (a. HA, b. FA) and soil (c) samples before and after PFOA adsorption.

**References**

1. A.B. Ghita, H. Mohamed, C. Juan, J.A. Alburquerque, J. Gonzálvez, V. Gilard, J.C. Revel, Characterization of fulvic acids by elemental and spectroscopic (FTIR and 13C-NMR) analyses during composting of olive mill wastes plus straw, Bioresour. Technol. 93 (2004), 285-290. <https://doi.org/10.1016/j.biortech.2003.10.026>.
2. W. Akira, F. Nobuhide, Comparability of composition of carbon functional groups in humic acids between inverse-gated decoupling and cross polarization/magic angle spinning 13C nuclear magnetic resonance techniques, Anal. Chim. Acta 618 (2008), 110-115. <https://doi.org/10.1016/j.aca.2008.04.045>.
3. H.V. Nguyen, H.S. Lee, S.Y. Lee, Changes in structural characteristics of humic and fulvic acids under chlorination and their association with trihalomethanes and haloacetic acids formation, Sci. Total Environ. 790 (2021), 148142. <https://doi.org/10.1016/j.scitotenv.2021.148142>.
4. X.L. Chai, S. Takayuki., Q. Guo, Z. Youcai, Characterization of humic and fulvic acids extracted from landfill by elemental composition, 13C CP/MAS NMR and TMAH-Py-GC/MS, Waste Manage. 28 (2008), 896-903. <https://doi.org/10.1016/j.wasman.2007.02.004>.
